# Supplementary material for: Chemiluminescence from the biomimetic reaction of 1,2,4-trioxolanes and 1,2,4,5-tetroxanes with ferrous ions
Source: Royal Society of Chemistry journal article supplement (doi:10.1039/c1ra00784j), 2011-11-11
Supplement: c1ra00784j.pdf [file c1ra00784j.pdf]

## Supporting Information

### Chemiluminescence from the Biomimetic Reaction of 1,2,4-Trioxolanes and 1,2,4,5-Tetroxanes with Ferrous Ions

Dmitri V. Kazakov<sup>a\*</sup>, Azat R. Timerbaev<sup>a</sup>, Farit E. Safarov<sup>a</sup>, Timur A. Nazirov<sup>a</sup>, Oxana B. Kazakova<sup>a</sup>, Gumer Yu. Ishmuratov, Alexandr O. Terent'ev<sup>b</sup>, Dmitri A. Borisov<sup>b</sup>, Alexandr G. Tolstikov<sup>c</sup>, Genrikh A. Tolstikov<sup>a</sup>, Waldemar Adam<sup>d</sup>

<sup>a</sup>*Institute of Organic Chemistry, Ufa Scientific Centre of the RAS, 71 Prospect Oktyabrya,  
450054 Ufa, Russia*

<sup>b</sup>*Zelinsky Institute of Organic Chemistry of the RAS, 47 Leninskiy prospekt,  
119991 Moscow, Russia*

<sup>c</sup>*Institute of Petrochemistry and Catalysis of the RAS, 141 Prospect Oktyabrya, 450075 Ufa,  
Russia*

<sup>d</sup>*Institut für Organische Chemie der Universität Würzburg, Am Hubland, D-97074 Würzburg,  
Germany, Department of Chemistry, Facundo Bueso 110, University of Puerto Rico, Rio  
Piedras, Puerto Rico 00931, USA*

**Content:** The Supporting Information (SI) material consists of the chemiluminescence procedure for the reaction of the cyclic peroxides with ferrous ions, the fluorescence and chemiluminescence spectra (taken by means of cut-off filters) recorded in the peroxide reactions (see Figures S-1, S-2, S-4, and S-5), and the kinetics of the chemiluminescence decay (see Figure S-3).

## Measurement of the Chemiluminescence in the Reaction of Cyclic Peroxides **1-3**, OZ03 and Artemisinin with Ferrous Ion in CH<sub>3</sub>CN/H<sub>2</sub>O Solution.

In a typical procedure, an aliquot of the cyclic peroxide in a CH<sub>3</sub>CN:H<sub>2</sub>O (1:1) mixture was transferred to a cuvette, which was placed above the photocathode of the photomultiplier. Subsequently, an aliquot of FeSO<sub>4</sub>/rhodamine G in CH<sub>3</sub>CN:H<sub>2</sub>O (1:1) mixture was rapidly (ca. 1 s) injected into the peroxide solution and immediately the CL was recorded. Similarly, in another set of experiments, a solution of FeCl<sub>3</sub>/rhodamine G in aqueous (50%) acetonitrile was added rapidly to a mixture of *L*-cysteine hydrochloride and the cyclic peroxide in CH<sub>3</sub>CN:H<sub>2</sub>O (1:1) solution, and immediately the CL was recorded. All reactions were carried out at 70 °C (for peroxides **1-3** and OZ03) or 60 °C (for artemisinin) by bubbling a slow stream of oxygen gas through the CH<sub>3</sub>CN/H<sub>2</sub>O solution. Solutions in the cuvette and in the injector were thermostated at the required temperature for ca. 5 min prior to initiating the reaction.

The following concentrations of the reagents in the cuvette were chosen:

[peroxides **1** or **2**] = [FeCl<sub>3</sub>] = [Rhodamine G] = 1.5×10<sup>-3</sup> M, [*L*-cysteine] = 3×10<sup>-3</sup> M;

[peroxide **3**] = 2×10<sup>-3</sup> M, [FeCl<sub>3</sub>] = 3×10<sup>-3</sup> M, [*L*-cysteine] = 5×10<sup>-3</sup> M, [rhodamine G] = 3×10<sup>-3</sup> M;

[artemisinin] = 2×10<sup>-2</sup> M, [FeSO<sub>4</sub>] = 4×10<sup>-3</sup> M, [rhodamine G] = 1×10<sup>-3</sup> M or

[artemisinin] = 2×10<sup>-2</sup> M, [FeCl<sub>3</sub>] = 1×10<sup>-2</sup> M, [*L*-cysteine] = 2×10<sup>-2</sup> M, [rhodamine G] = 1×10<sup>-2</sup> M;

[OZ03] = 2×10<sup>-3</sup> M, [FeSO<sub>4</sub>] = 1×10<sup>-3</sup> M, [rhodamine G] = 5×10<sup>-4</sup> M or

[OZ03] = [FeCl<sub>3</sub>] = 1.5×10<sup>-3</sup> M, [*L*-cysteine] = 3×10<sup>-3</sup> M, [rhodamine G] = 1.5×10<sup>-3</sup> M.

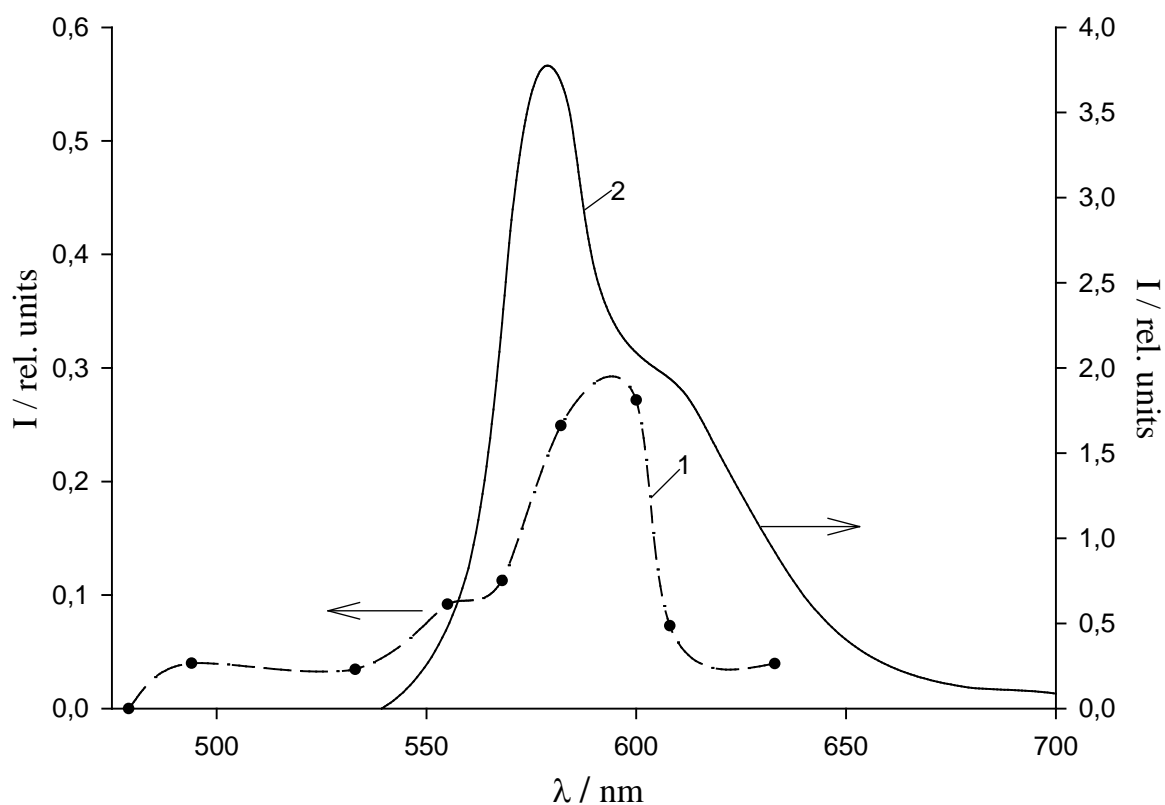

**Figure S-1.** Curve 1 (dashed line) represents the CL spectrum for the reaction of peroxide **1** with  $\text{FeCl}_3$  in the presence of L-cysteine and rhodamine G ( $[\text{peroxide } \mathbf{1}] = [\text{FeCl}_3] = [\text{Rhodamine G}] = 1.5 \times 10^{-3} \text{ M}$ ,  $[\text{L-cysteine}] = 3 \times 10^{-3} \text{ M}$ ,  $\text{CH}_3\text{CN}/\text{H}_2\text{O}$  (1:1),  $70^\circ \text{C}$ ,  $\text{O}_2$  atmosphere). Curve 2 (solid line) represents the fluorescence spectrum of rhodamine G ( $[\text{Rhodamine G}] = 1 \times 10^{-5} \text{ M}$ ,  $\text{CH}_3\text{CN}/\text{H}_2\text{O}$  (1:1),  $\lambda_{\text{ex}} = 488 \text{ nm}$ .)

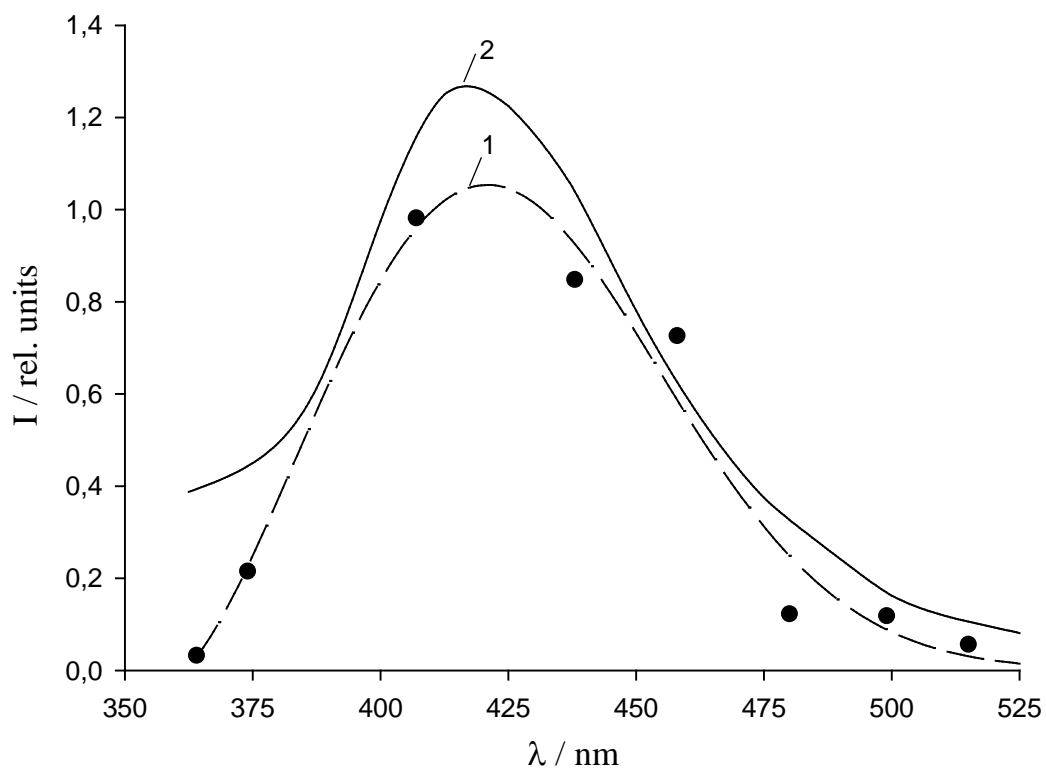

**Figure S-2.** Curve 1 (dashed line) represents the CL spectrum for the reaction of the trifluoroacetone tetroxane **4** with  $\text{FeSO}_4$  ( $[\text{peroxide } \mathbf{4}] = [\text{FeSO}_4] = 2 \times 10^{-3} \text{ M}$ ,  $\text{CH}_3\text{CN}:\text{H}_2\text{O}$  (1:1),  $30^\circ \text{C}$ ). Curve 2 (solid line) represents the fluorescence spectrum of 1,1,1-trifluoroacetone in aqueous (50%) acetonitrile ( $1.5 \times 10^{-2} \text{ M}$ ,  $5^\circ \text{C}$ )

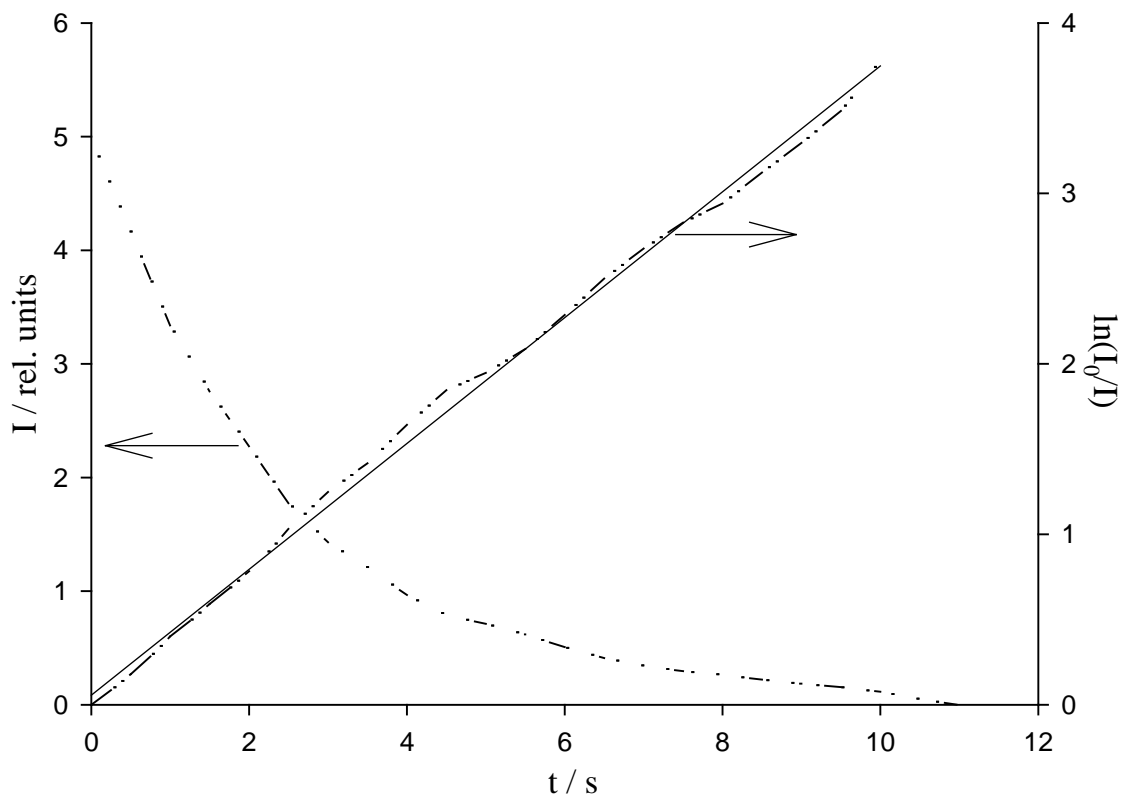

**Figure S-3.** Time profile of the CL decay for the reaction of the trifluoroacetone tetroxane **4** with  $\text{FeSO}_4$  and its semi-logarithmic plot for the first-order kinetics ( $[\text{peroxide } \mathbf{4}] = 2 \times 10^{-4} \text{ M}$ ,  $[\text{FeSO}_4] = 4 \times 10^{-3} \text{ M}$ ,  $\text{CH}_3\text{CN} : \text{H}_2\text{O} (1:1)$ ,  $30^\circ \text{C}$ ).

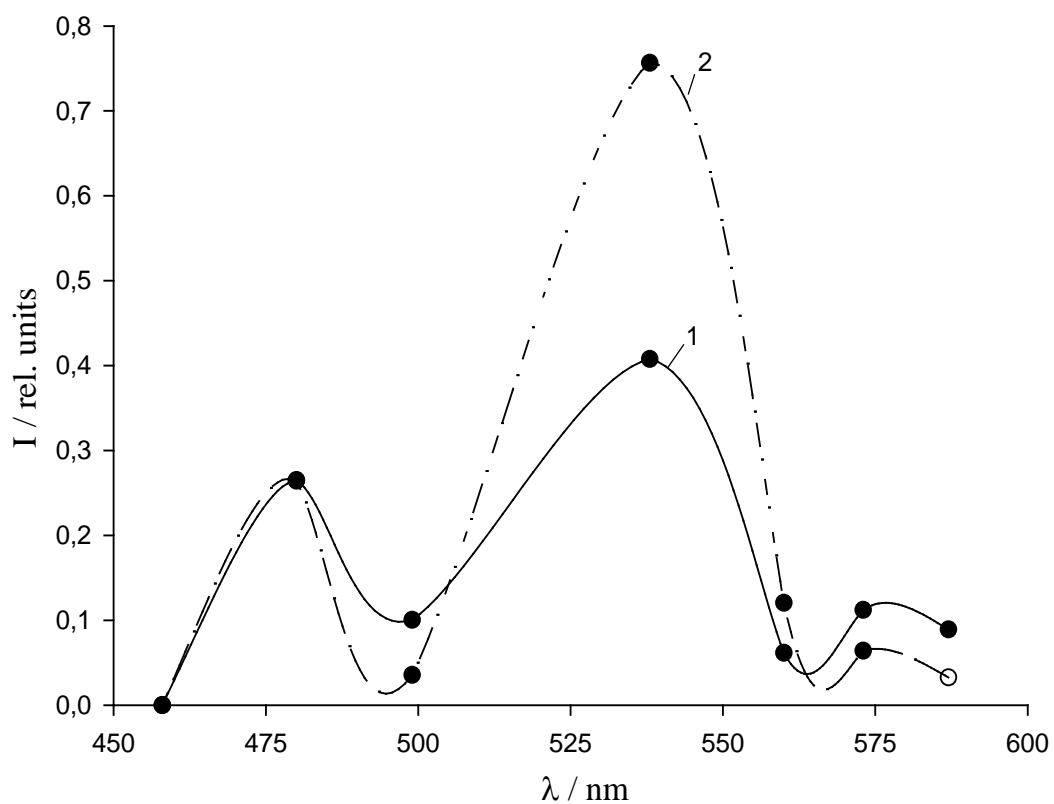

**Figure S-4.** CL spectrum for the reaction of the bicyclic tetroxane **5** with FeSO<sub>4</sub> ([tetroxane **5**] = [FeSO<sub>4</sub>] = 2×10<sup>-3</sup> M, CH<sub>3</sub>CN : H<sub>2</sub>O (1:1), 60 °C) taken under oxygen (curve 1, solid line) and argon (curve 2, dashed line) atmospheres.

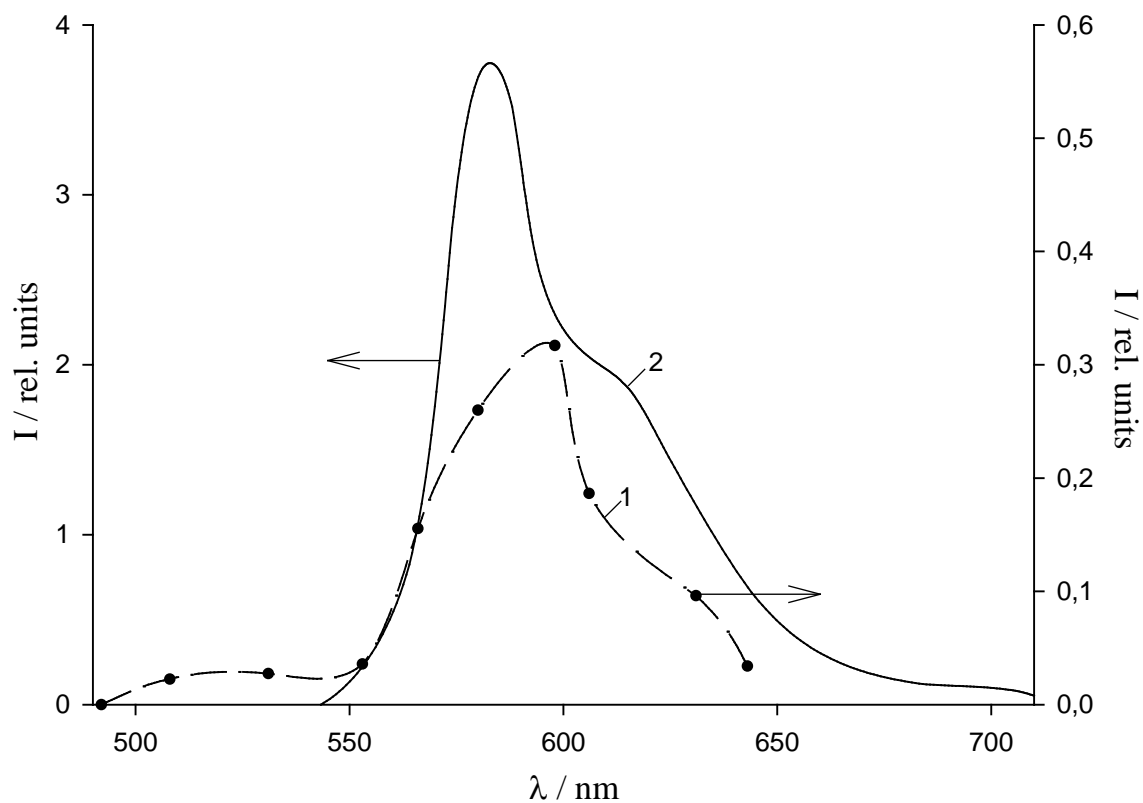

**Figure S-5.** Curve 1 (dashed line) represents the CL spectrum for the reaction of the bicyclic tetroxane **5** with FeSO<sub>4</sub> in the presence of rhodamine G ([tetroxane **5**] = 5×10<sup>-3</sup> M, [FeSO<sub>4</sub>] = 1×10<sup>-3</sup> M, [Rd] = 2×10<sup>-3</sup> M, CH<sub>3</sub>CN/H<sub>2</sub>O (1:1), 60 °C). Curve 2 (solid line) represents the fluorescence spectrum of rhodamine G ([Rhodamine G] = 1×10<sup>-5</sup> M, CH<sub>3</sub>CN/H<sub>2</sub>O (1:1), λ<sub>ex</sub> = 488 nm.)
